# Supplementary material for: Role of Artificial Intelligence Applications in Real-Life Clinical Practice: Systematic Review
Source: PubMed Central journal article supplement (PMC8103304; doi:10.2196/25759), 2021-04-22
Supplement: jmir_v23i4e25759_app3.pdf [file jmir_v23i4e25759_app3.pdf]

### Multimedia Appendix 3. AI application characteristics

| Author, year                  | AI applications                                                                                                                                                         | AI techniques                                | Clinical tasks    | Disease domains and conditions                   |
|-------------------------------|-------------------------------------------------------------------------------------------------------------------------------------------------------------------------|----------------------------------------------|-------------------|--------------------------------------------------|
| Abràmoff et al, 2018 [25]     | IDx-DR diagnostic system (IDx LLC, Coralville, IA) for automatic detection of diabetic retinopathy and diabetic macular edema based on retinal images                   | ML (CNN <sup>a</sup> )                       | Disease diagnosis | Diabetic retinopathy and diabetic macular edema  |
| Aoki et al, 2020 [26]         | A deep learning-based system that automatically detects mucosal breaks based on small-bowel capsule endoscopy images                                                    | ML (CNN)                                     | Disease screening | Small-bowel diseases                             |
| Arbabshirani et al, 2018 [27] | A deep learning algorithm for intracranial hemorrhage diagnosis based on computed tomography scans of the head                                                          | ML (CNN)                                     | Disease diagnosis | Intracranial hemorrhage                          |
| Bailey et al, 2013 [28]       | A real-time algorithm for clinical deterioration for patients in general medical wards based on vital sign measures                                                     | ML (DT <sup>a</sup> , LR <sup>a</sup> )      | Risk analysis     | Sepsis                                           |
| Barinov et al, 2019 [29]      | An AI-based decision support system for breast cancer diagnosis based on ultrasound images                                                                              | ML (NR <sup>b</sup> )                        | Disease diagnosis | Breast cancer                                    |
| Beaudoin et al, 2016 [30]     | A clinical decision support system for antimicrobial stewardship based on patient clinical data                                                                         | ML (rule induction, instance-based learning) | Treatment         | General: antimicrobial prescriptions             |
| Bien et al, 2018 [31]         | MRNet, a diagnostic algorithm based on knee magnetic resonance imaging                                                                                                  | ML (CNN)                                     | Disease diagnosis | Anterior cruciate ligament tears; meniscal tears |
| Brennan et al, 2019 [32]      | MySurgeryRisk, an algorithm for automated preoperative risk assessment based on the EHR data                                                                            | ML (RF <sup>a</sup> )                        | Risk analysis     | Surgery-related risk                             |
| Chen et al, 2020 [33]         | ENDOANGEL (previous WISENSE AI system), a real-time AI system that monitors blind spots during EGD                                                                      | ML (CNN, DRL <sup>a</sup> )                  | Disease screening | Esophageal, gastric, and duodenal diseases       |
| Connell et al, 2019 [34]      | Streams (DeepMind Technologies Ltd, London, UK), a digitally-enabled care pathway for acute kidney injury management that incorporated in a mobile application          | ML (NR)                                      | Risk analysis     | Acute kidney injury                              |
| Eshel et al, 2017 [35]        | Parasight Platform (SightDX, Tel Aviv), an automated system that provides malaria diagnosis, species identification, and parasite quantification based on blood samples | ML (SVM <sup>a</sup> )                       | Disease diagnosis | Malaria                                          |
| Giannini et al, 2019 [36]     | Early Warning System 2.0 (EWS 2.0), an ML-based tool that provides severe sepsis and sepsis shock prediction based on the clinical data from EHR                        | ML (RF)                                      | Risk analysis     | Sepsis                                           |
| Ginestra et al, 2019 [37]     | An early warning system that provides severe sepsis and sepsis shock prediction based on the clinical data from EHR                                                     | ML (NR)                                      | Risk analysis     | Sepsis                                           |

|                                |                                                                                                                                                                                    |                                                                               |                   |                                  |
|--------------------------------|------------------------------------------------------------------------------------------------------------------------------------------------------------------------------------|-------------------------------------------------------------------------------|-------------------|----------------------------------|
| Gómez-Vallejo et al, 2016 [38] | InNoCBR, a case-based reasoning system for automatic healthcare-associated infection surveillance and diagnosis                                                                    | ML (NB <sup>a</sup> , PART <sup>a</sup> , DT)                                 | Risk analysis     | Healthcare-associated infections |
| Grunwald et al, 2016 [39]      | Electronic Alberta Stroke Program Early CT (e-ASPECT) (Brainomix Limited, Summertown, Oxford, UK), a tool for early detection of ischemic damage based on CT scans                 | ML (RF)                                                                       | Triage; Treatment | Stroke                           |
| Kanagasingam et al, 2018 [40]  | An AI-based grading system for diabetic retinopathy based on retinal images                                                                                                        | ML (CNN)                                                                      | Disease screening | Diabetic retinopathy             |
| Keel et al, 2018 [41]          | A deep learning algorithm for referable diabetic retinopathy screening based on retinal images                                                                                     | ML (CNN)                                                                      | Disease screening | Diabetic retinopathy             |
| Kiani et al, 2020 [42]         | A DL-based system for histopathologic classification of liver cancer (i.e., hepatocellular carcinoma, cholangiocarcinoma) based on whole-slide images                              | ML (CNN)                                                                      | Disease diagnosis | Liver cancer                     |
| Lagani et al, 2015 [43]        | An AI-based system that predicts the long-term risk of diabetes-related complications based on individual patient profiles                                                         | ML (cox model, AFT <sup>a</sup> model, RSF <sup>a</sup> , SCVR <sup>a</sup> ) | Risk analysis     | Diabetes                         |
| Lin et al, 2019 [44]           | CC-Cruiser platform, an AI-based online platform for congenital cataract based on eye images                                                                                       | ML (CNN)                                                                      | Disease diagnosis | Childhood cataracts              |
| Lindsey et al, 2018 [45]       | A deep learning algorithm to detect and localize fractures in radiographs                                                                                                          | ML (CNN)                                                                      | Disease diagnosis | Fracture detection               |
| Liu et al, 2020 [46]           | An algorithm for polyp and adenoma detection in colonoscopy (Henan Xuanweitang Medical Information Technology Co., LTD., Zhengzhou, Henan, China)                                  | ML (CNN)                                                                      | Disease screening | Polyp and adenoma                |
| Mango et al, 2020 [47]         | Koios DS for Breast, an AI-based system that provides decision support for breast ultrasound lesion assessment (Koios Medical, NY, US)                                             | ML (NR)                                                                       | Disease diagnosis | Breast cancer                    |
| Martin et al, 2012 [48]        | Patient Journey Record system, a system that detects adverse changes in patient biopsychosocial trajectories                                                                       | ML (rule-based algorithms)                                                    | Risk analysis     | General                          |
| McCoy and Das, 2017 [49]       | InSight (Dascena, Hayward, California), a sepsis prediction algorithm based on EHR data                                                                                            | ML (NR)                                                                       | Risk analysis     | Sepsis                           |
| McNamara et al, 2019 [50]      | Watson for Oncology with Cota RWE platform (IBM Watson Health, Cambridge, MA), a clinical decision support system that provides treatment recommendations for patients with cancer | ML (NR)                                                                       | Treatment         | Breast cancer                    |
| Mori et al, 2018 [51]          | An AI-based CAD system in assessing diminutive polyps during colonoscopy                                                                                                           | ML (SVM)                                                                      | Disease screening | Diminutive polyps                |
| Nagaratnam et al, 2020 [52]    | e-Stroke Suite (Brainomix Limited, Summertown, Oxford, UK)                                                                                                                         | ML (DL)                                                                       | Treatment         | Hyperacute stroke                |
| Natarajan et al, 2019 [53]     | Medios AI (Remidio Innovative Solutions Pvt Ltd, Karnataka, India), a mobile-based automated system for                                                                            | ML (CNN)                                                                      | Disease screening | Diabetic retinopathy             |

|                                |                                                                                                                                                                                                    |                                |                           |                                               |  |
|--------------------------------|----------------------------------------------------------------------------------------------------------------------------------------------------------------------------------------------------|--------------------------------|---------------------------|-----------------------------------------------|--|
|                                | diabetic retinopathy screening based on retinal images                                                                                                                                             |                                |                           |                                               |  |
| Nicolae et al, 2020 [54]       | An ML-based prostate implant planning algorithm                                                                                                                                                    | ML (kNN <sup>a</sup> )         | Treatment                 | Prostate cancer                               |  |
| Park et al, 2019 [55]          | HeadXNet Model, a segmentation model that predicts intracranial aneurysms based on head computed tomographic angiography imaging                                                                   | ML (CNN)                       | Disease diagnosis         | Cerebral aneurysms                            |  |
| Romero-Brufau et al, 2020 [56] | A commercial AI-based clinical decision support tool to improve glycemic control in patients with diabetes                                                                                         | NR                             | Risk analysis             | Diabetes                                      |  |
| Rostill et al, 2018 [57]       | Technology integrated health management, an IoT system for dementia care                                                                                                                           | ML (Markov chain model)        | Risk analysis             | Dementia                                      |  |
| Segal et al, 2014 [58]         | SimulConsult diagnostic decision support system (SimulConsult, Chestnut Hill, MA), a system that informs diagnostic assessments based on the temporal pattern of clinical findings in each disease | ML (Bayesian pattern matching) | Disease diagnosis         | Neurological disorders                        |  |
| Segal et al, 2016 [59]         | SimulConsult diagnostic decision support system                                                                                                                                                    | ML (Bayesian pattern matching) | Disease diagnosis         | Pediatric rheumatologic disorders             |  |
| Segal et al, 2017 [60]         | SimulConsult diagnostic decision support system                                                                                                                                                    | ML (Bayesian pattern matching) | Disease diagnosis         | Child neurology diseases                      |  |
| Segal et al, 2019 [61]         | MedAware, an ML-based system for identification and prevention of prescription error                                                                                                               | ML (NR)                        | Treatment                 | General: prescriptions                        |  |
| Shimabukuro et al, 2017 [62]   | A commercial sepsis prediction algorithm (Dascena, Hayward, California)                                                                                                                            | ML (NR)                        | Risk analysis             | Sepsis                                        |  |
| Sim et al, 2020 [63]           | Samsung Auto Lung Nodule (ALAND) (Samsung Electronics, Suwon, South Korea), an ML-based software that detects malignant lung nodules on chest radiographs                                          | ML (CNN)                       | Disease screening         | Malignant pulmonary nodules                   |  |
| Steiner et al, 2018 [64]       | A deep learning algorithm that reviews lymph nodes for metastatic breast cancer diagnosis                                                                                                          | ML (CNN)                       | Disease screening         | Breast cancer metastasis                      |  |
| Su et al, 2020 [65]            | An automated system for polyp and adenoma detection in colonoscopy (Qingdao Medicon Digital Engineering Co Ltd, Shandong, China)                                                                   | ML (CNN)                       | Disease screening         | Colorectal cancer                             |  |
| Titano et al, 2018 [66]        | An algorithm for automated surveillance and triage of cranial images                                                                                                                               | ML (CNN)                       | Disease diagnosis; Triage | Acute neurologic events                       |  |
| Vandenberghe et al, 2017 [67]  | An algorithm that recognizes cancer cell types and predicts HER2 status in breast cancer based on tumor resection samples (AstraZeneca, Cambridge, UK)                                             | ML (CNN)                       | Disease diagnosis         | Breast cancer                                 |  |
| Voerman et al, 2019 [68]       | A procalcitonin-guided decision algorithm for antibiotic stewardship                                                                                                                               | ML (NR)                        | Treatment                 | Sepsis and lower respiratory tract infections |  |

|                            |                                                                                                                                                     |                             |                   |                              |
|----------------------------|-----------------------------------------------------------------------------------------------------------------------------------------------------|-----------------------------|-------------------|------------------------------|
| Wang et al, 2019 [69]      | A real-time automatic polyp and adenoma detection system in colonoscopy (Shanghai Wision AI, Shanghai, China)                                       | ML (CNN)                    | Disease screening | Polyp and colorectal adenoma |
| Wang et al, 2019 [70]      | An algorithm that identifies patients with atrial fibrillation and recommends anticoagulation usage based on EHR data                               | ML (NR)                     | Risk analysis     | Atrial fibrillation          |
| Wang et al, 2020 [71]      | EndoScreener, a polyp and adenoma detection system in colonoscopy (Shanghai Wision AI, Shanghai, China)                                             | ML (deep learning)          | Disease screening | Polyp and adenoma            |
| Wijnberge et al, 2020 [72] | An early warning system for intraoperative hypotension based on hemodynamic variables (Edwards Lifesciences, Irvine, California)                    | ML                          | Risk analysis     | Hypertension                 |
| Wu et al, 2019 [73]        | Cataract AI agent (Beijing Tulip Partners Technology, Beijing, China), a platform for collaborative management of cataracts based on retinal images | ML (CNN)                    | Disease screening | Cataract                     |
| Wu et al, 2019 [74]        | WISENSE, a real-time AI system that monitors blind spots during EGD and facilitates the diagnosis of upper gastrointestinal lesions                 | Machine learning (CNN, DRL) | Disease screening | Gastric cancer               |
| Yoo et al, 2018 [75]       | A real-time computer-aided system for thyroid nodule diagnosis based on ultrasonography images (S-Detect for Thyroid; Samsung Medison Co., Ltd)     | NR                          | Disease diagnosis | Thyroid cancer               |

<sup>a</sup>CNN: convolutional neural networks; DT: decision tree; LR: logistic regression; RF: random forests; DRL: deep reinforcement learning; SVM: support vector machine; NB: naïve Bayes; PART: partial decision tree algorithm; AFT model: accelerated failure time model; RSF: random survival forest; SCVR: support vector machine censored regression; kNN: k-nearest neighbor.

<sup>b</sup>NR: not reported.
