# Supplementary material for: Role of Artificial Intelligence Applications in Real-Life Clinical Practice: Systematic Review
Source: PubMed Central journal article supplement (PMC8103304; doi:10.2196/25759), 2021-04-22
Supplement: jmir_v23i4e25759_app4.pdf [file jmir_v23i4e25759_app4.pdf]

#### Multimedia Appendix 4. Evaluation outcomes and main results of the included studies

| Author (year)                 | Implementation of AI systems                                                                                                                              | Comparison group(s) (if any)                                          | Findings                                                                                               |                                                                                                                                                                                        |                                                                                                                                                  |                       |
|-------------------------------|-----------------------------------------------------------------------------------------------------------------------------------------------------------|-----------------------------------------------------------------------|--------------------------------------------------------------------------------------------------------|----------------------------------------------------------------------------------------------------------------------------------------------------------------------------------------|--------------------------------------------------------------------------------------------------------------------------------------------------|-----------------------|
|                               |                                                                                                                                                           |                                                                       | Application performance (AP)                                                                           | Clinician outcomes (CO)                                                                                                                                                                | Quality of care (QOC)                                                                                                                            | Economic impacts (EI) |
| Abramoff et al, 2018 [25]     | Conduct a trial of IDx-DR diagnostic system to detect diabetic retinopathy<br>Length: 7 months                                                            | N/A <sup>a</sup><br>(set pre-defined primary endpoint goals)          | Sensitivity: 87.2% (>85%)<br>Specificity: 90.7% (>82.5%)<br>Imageability rate: 96.1%                   | N/A                                                                                                                                                                                    | N/A                                                                                                                                              | N/A                   |
| Aoki et al, 2020 [26]         | Endoscopist readings after the first screening by the AI system for mucosal break detection<br>Task: 20 videos of small-bowel capsule endoscopy procedure | Endoscopist-alone readings                                            | N/A                                                                                                    | Reading time: I <sup>b</sup> (expert, 3.1 min; trainee, 5.2 min) vs. C <sup>b</sup> (expert, 12.2 min; trainee, 20.7 min), p<0.001<br>Detection rate of mucosal break: ns <sup>c</sup> | N/A                                                                                                                                              | N/A                   |
| Arbabshirani et al, 2018 [27] | Re-prioritize head CT studies by implementing a DL model for intracranial hemorrhage (ICH) diagnosis<br>Length: 3 months                                  | ICH detection in routine studies                                      | AUC: 0.846<br>Accuracy: 84%<br>Sensitivity: 70%<br>Specificity: 87%                                    | Time to diagnosis: I (19 min) vs. C (512 min), p<0.0001<br>94 cases were upgraded, and 5 new ICH cases were identified.                                                                | N/A                                                                                                                                              | N/A                   |
| Bailey et al, 2013 [28]       | Patients receive real-time alerts an AI sepsis prediction tool<br>Length: 4 years and 5 months                                                            | Patients without real-time alerts of the AI tool                      | N/A                                                                                                    | N/A                                                                                                                                                                                    | ICU <sup>d</sup> transfer: patients flagged at high-risk were at higher risk (15.2% vs. 2.9%)<br>Hospital mortality: ns<br>LOS <sup>d</sup> : ns | N/A                   |
| Barinov et al, 2019 [29]      | Sequential workflow<br>Task: 500 lesion cases                                                                                                             | Independent workflow                                                  | AUC: 0.864 (>radiologist alone)                                                                        | AUC: higher AUC in independent workflow<br>Kendall's tau-b: 0.529-0.597                                                                                                                | N/A                                                                                                                                              | N/A                   |
| Beaudoin et al, 2016 [30]     | Implement a system (baseline system with learning module) for antimicrobial stewardship<br>Length: 2 months                                               | Baseline model (B), learning module for antimicrobial stewardship (L) | Trigger 43 recommendations out of 270 alerts (B: 38/240; L: 17/105)<br>Precision: 74% (B: 82%; L: 62%) | N/A                                                                                                                                                                                    | N/A                                                                                                                                              | N/A                   |

|                          |                                                                                                   |                                                                                                   |                                                                         |                                                                                                                                                                                              |                                                                                                                                                                                                                                                                                            |     |
|--------------------------|---------------------------------------------------------------------------------------------------|---------------------------------------------------------------------------------------------------|-------------------------------------------------------------------------|----------------------------------------------------------------------------------------------------------------------------------------------------------------------------------------------|--------------------------------------------------------------------------------------------------------------------------------------------------------------------------------------------------------------------------------------------------------------------------------------------|-----|
|                          |                                                                                                   |                                                                                                   | Recall: 96% (B: 94%; L: 31%)<br>Accuracy: 79% (B: 85%; L: 51%)          |                                                                                                                                                                                              |                                                                                                                                                                                                                                                                                            |     |
| Bien et al, 2018 [31]    | Clinical experts assisted by MRNet<br>Task: 60 exams                                              | Clinical experts without assistance from MRNet                                                    | AUC (abnormality, ACL tears, meniscal tears): 0.937, 0.965, 0.937       | Abnormality: ns<br>ACL tears: higher sensitivity (p=0.002) and specificity (p<0.001)<br>Meniscal tears: higher specificity (p=0.003)                                                         | N/A                                                                                                                                                                                                                                                                                        | N/A |
| Brennan et al, 2019 [32] | Physicians with assistance from MySurgeryRisk<br>Task: 150 patient cases                          | Physicians without assistance                                                                     | AUC: 0.73-0.85 (higher than physicians' initial assessments, 0.47-0.69) | Decision changes: changed in 75% cases, change 8%-10% risk scores on average<br>AUC: increase by 5% in predicting cardiovascular complications (other complications: ns)<br>Usability: mixed | N/A                                                                                                                                                                                                                                                                                        | N/A |
| Chen et al, 2020 [33]    | Patients undergo EGD assisted by ENDOANGEL<br>Task: 217 patients (lost to follow up not reported) | Patients undergo EGD without AI assistance<br>Task: 218 patients (lost to follow up not reported) | N/A                                                                     | Lower blind spot rate in sedated C-EGD (I: 3.42%, C: 22.46%), unsedated U-TOE (I: 21.77%, C: 29.92%), unsedated C-EGD (I: 31.23%, C: 42.46%) (p<0.001)                                       | N/A                                                                                                                                                                                                                                                                                        | N/A |
| Connell et al, 2019 [34] | Implementation of Streams (digitally enable care pathway) in one hospital                         | No Streams implemented in another hospital                                                        | N/A                                                                     | N/A                                                                                                                                                                                          | Renal recovery rate: no compelling effects (ns)<br>Secondary clinical outcomes: no compelling effects (ns)<br>Care process: reduced unrecognized AKI cases (p<0.001), reduced time from ED registration to AKI recognition (p<0.001), reduced time to treatment of nephrotoxins (p=0.047). | N/A |

|                                |                                                                                                                         |                                                  |                                                                                                                                                                                                                           |                                                                                                                                                                                                                                             |                                                                                                                                                |     |
|--------------------------------|-------------------------------------------------------------------------------------------------------------------------|--------------------------------------------------|---------------------------------------------------------------------------------------------------------------------------------------------------------------------------------------------------------------------------|---------------------------------------------------------------------------------------------------------------------------------------------------------------------------------------------------------------------------------------------|------------------------------------------------------------------------------------------------------------------------------------------------|-----|
|                                |                                                                                                                         |                                                  |                                                                                                                                                                                                                           |                                                                                                                                                                                                                                             | No significant differences in the release time of creatinine tests and time to treatment for patients with sepsis-related AKI and obstruction. |     |
| Eshel et al, 2017 [35]         | Microscopists use Parasight Platform for malaria diagnosis<br>Task: 205 samples in India (IN) 263 samples in Kenya (KE) | Microscopy<br>Rapid diagnostic test (RDT)<br>PCR | Sensitivity: 99% (IN), 99.3% (KE)<br>Specificity: 100% (IN), 98.9% (KE)<br>P. vivax/ P. falciparum. identification accuracy: 100%/ 100% (IN), 100%/ 96.1% (KE)<br>Device parasite count correlation: 0.84 (IN), 0.85 (KE) | N/A                                                                                                                                                                                                                                         | N/A                                                                                                                                            | N/A |
| Giannini et al, 2019 [36]      | Implement Early Warning System 2.0 to predict sepsis<br>Silent period: 6 months<br>Alert period: 8 months               | Pre-implementation period                        | Sensitivity: 26%<br>Specificity: 98%                                                                                                                                                                                      | N/A                                                                                                                                                                                                                                         | Mortality: ns<br>Discharge disposition: ns<br>ICU transfer: ns<br>Reduced time-to-ICU transfer (p<0.01)<br>Clinical processes: limited changes | N/A |
| Ginestra et al, 2019 [37]      | Implement an early warning system for severe sepsis prediction<br>Length: 6 weeks                                       | N/A                                              | N/A                                                                                                                                                                                                                       | Perceptions: 42% nurse and 16% providers perceived the alerts to be helpful. Nurses (13%) and providers (40%) differed in perceptions of sepsis presence at the time of alert. Few changed their perceptions (30% nurses and 9% providers). | N/A                                                                                                                                            | N/A |
| Gómez-Vallejo et al, 2016 [38] | Deploy InNoCBR in a public hospital<br>Length: 10 months                                                                | N/A                                              | Accuracy: 70.21%                                                                                                                                                                                                          | System perceptions: the system is effective at decreasing infections and may                                                                                                                                                                |                                                                                                                                                | N/A |

|                               |                                                                                                |                                                     |                                                                                                                                                |                                                                                                                                                                                                                                                       |                                                                                              |     |
|-------------------------------|------------------------------------------------------------------------------------------------|-----------------------------------------------------|------------------------------------------------------------------------------------------------------------------------------------------------|-------------------------------------------------------------------------------------------------------------------------------------------------------------------------------------------------------------------------------------------------------|----------------------------------------------------------------------------------------------|-----|
|                               |                                                                                                |                                                     |                                                                                                                                                | reduce needed manpower by 70%.                                                                                                                                                                                                                        |                                                                                              |     |
| Grunwald et al, 2016 [39]     | Implement e-ASPECT into an ambulance                                                           | N/A                                                 | E-ASPECTS results matched analysis of neuroradiologist.                                                                                        | N/A                                                                                                                                                                                                                                                   | N/A                                                                                          | N/A |
| Kanagasingam et al, 2018 [40] | Deploy an AI-based system for diabetic retinopathy in clinical practice<br>Length: 6 months    | N/A                                                 | Sensitivity: 2 patients with severe disease were correctly identified<br>Specificity: 92%<br>PPV <sup>d</sup> : 12%<br>NPV <sup>d</sup> : 100% | N/A                                                                                                                                                                                                                                                   | N/A                                                                                          | N/A |
| Keel et al, 2018 [41]         | Deploy a DL learning algorithm for referable diabetic retinopathy<br>Length: 4 months          | N/A                                                 | Sensitivity: 92.3%<br>Specificity: 93.7%<br>Mean assessment time: 6.9 min                                                                      | N/A                                                                                                                                                                                                                                                   | Patient acceptability: 96% patients are satisfied and 78% preferred AI over manual approach. | N/A |
| Kiani et al, 2020 [42]        | Pathologists assisted by a DL-based system for liver cancer classification<br>Task: 80 samples | Unassisted pathologists                             | Accuracy: 0.842                                                                                                                                | Accuracy: ns among 11 pathologists; AI improved accuracy among 9 pathologists with well-defined experience levels ( $p = 0.045$ ); AI improved accuracy when it was correct ( $p < 0.001$ ) and decreased accuracy when it was wrong ( $p < 0.001$ ). | N/A                                                                                          | N/A |
| Lagani et al, 2015 [43]       | An AI-based system that predicts the long-term risk of diabetes-related complications          | N/A                                                 | Performance: comparable to UKPDS                                                                                                               | Usability: overall positive feedback and criticisms for the system interface                                                                                                                                                                          | N/A                                                                                          | N/A |
| Lin et al, 2019 [44]          | Patients received diagnosis from CC-Cruiser platform<br>Length: about 9 months                 | Patients received diagnosis from senior consultants | Accuracy: 87.4% (C: 99.1%, $p < 0.001$ )<br>PPV: 74.4% (99.2%, $p < 0.001$ )<br>NPV: 95.0% (99.1%, $p < 0.001$ )                               | Time to diagnosis: I (2.79 min) vs. C (8.53 min), $p < 0.001$                                                                                                                                                                                         | High patient satisfaction                                                                    | N/A |
| Lindsey et al, 2018 [45]      | Clinicians assisted by a DL-based model to detect                                              | Clinicians without AI assistance                    | AUC: 0.967 and 0.994 on two test datasets                                                                                                      | Sensitivity: I (91.5%) vs. C (80.8% (95% CI), $p < 0.0001$ )                                                                                                                                                                                          | N/A                                                                                          | N/A |

|                           |                                                                                                                           |                                                    |                                                                                       |                                                                                                                                                                                                                                                  |                                                                                                                                                                 |     |
|---------------------------|---------------------------------------------------------------------------------------------------------------------------|----------------------------------------------------|---------------------------------------------------------------------------------------|--------------------------------------------------------------------------------------------------------------------------------------------------------------------------------------------------------------------------------------------------|-----------------------------------------------------------------------------------------------------------------------------------------------------------------|-----|
|                           | fractures in wrist radiographs<br>Task: 300 radiographs                                                                   |                                                    |                                                                                       | Specificity: I (93.9%) vs. C (87.5% (95% CI), $p < 0.0001$ )<br>Misinterpretation rate: decreased by 47.0%                                                                                                                                       |                                                                                                                                                                 |     |
| Liu et al, 2020 [46]      | Patients undergo colonoscopy with assistance from a CADe system<br>Length: 6 months                                       | Patients undergo colonoscopy without AI assistance | N/A                                                                                   | ADR <sup>d</sup> and PDR <sup>d</sup> : increased ADR (0.39 vs. 0.24) and PDR (0.44 vs. 0.28), increased number of detected adenomas (250 vs. 144) and polyps (486 vs. 248) ( $p < 0.001$ ), no increase in the detection of large adenomas (ns) | N/A                                                                                                                                                             | N/A |
| Mango et al, 2020 [47]    | Physicians assisted by Koios DS for Breast to make breast ultrasound lesion assessment<br>Task: 900 breast lesions        | Physicians without AI assistance                   | Sensitivity: 0.98<br>Specificity: 0.50<br>AUC: 0.87<br>( $>$ reader alone evaluation) | AUC: I (0.87) vs. C (0.83), $p < 0.0001$<br>Inter-reliability (Kendall $\tau$ -b): I (0.68) vs. C (0.54), $p < 0.01$<br>Intra-reliability improved: I (13.6%) vs. C (10.8%)                                                                      | N/A                                                                                                                                                             | N/A |
| Martin et al, 2012 [48]   | Patients assigned to intervention group (implementation of a complex adaptative chronic care system)<br>Length: 12 months | Patients assigned to usual care group              | Sensitivity: 100%<br>PPV: 70%                                                         | N/A                                                                                                                                                                                                                                              | ACSC <sup>d</sup> readmission reduced by 50%<br>Descriptive findings on care guides-supported activities and health service utilization                         | N/A |
| McCoy and Das, 2017 [49]  | Implementation of InSight to predict sepsis                                                                               | Pre-implementation period                          | N/A                                                                                   | N/A                                                                                                                                                                                                                                              | Hospital mortality: decrease by 60.24% ( $p < 0.01$ )<br>Hospital LOS: decrease by 9.55% ( $p = 0.077$ )<br>Readmission rate: decrease by 50.14% ( $p < 0.01$ ) | N/A |
| McNamara et al, 2019 [50] | Clinicians with assistance from IBM Watson for Oncology with Cota RWE platform<br>Task: 223 patient cases                 | Clinicians without assistance                      | N/A                                                                                   | Decision making: no significant difference in concordance; novices were more likely to choose non-recommended options without assistance ( $p < 0.01$ ) and                                                                                      | N/A                                                                                                                                                             | N/A |

|                                |                                                                                                          |                                       |                                                                                                                                                        |                                                                                                                                                                                                                      |                                                                                                 |     |
|--------------------------------|----------------------------------------------------------------------------------------------------------|---------------------------------------|--------------------------------------------------------------------------------------------------------------------------------------------------------|----------------------------------------------------------------------------------------------------------------------------------------------------------------------------------------------------------------------|-------------------------------------------------------------------------------------------------|-----|
|                                |                                                                                                          |                                       |                                                                                                                                                        | changed decisions in 39% cases.                                                                                                                                                                                      |                                                                                                 |     |
| Mori et al, 2018 [51]          | Real-time use of CAD during colonoscopy<br>Length: 7 months                                              | N/A                                   | NPV: 96.4% (best-case scenario) and 93.7% (worst-case scenario) with stained mode; 96.5% (best-case scenario) and 95.2% (worst-case scenario) with NBI | Time to diagnosis: 73 seconds for stained mode and 19 seconds for NBI mode                                                                                                                                           | N/A                                                                                             | N/A |
| Nagaratnam et al, 2020 [52]    | Implement e-Stroke Suite to improve mechanical thrombectomy referral pathway                             | N/A                                   | N/A                                                                                                                                                    | N/A                                                                                                                                                                                                                  | One patient case illustrates how e-Stroke supports patient care and improves clinical outcomes. | N/A |
| Natarajan et al, 2019 [53]     | Analyze the retinal images with Medios AI<br>Length: 2 months                                            | N/A                                   | Sensitivity: 100.0%<br>Specificity: 88.4% (higher than ophthalmologist: 85.2% sensitivity, 92.0% specificity)                                          | N/A                                                                                                                                                                                                                  | N/A                                                                                             | N/A |
| Nicolae et al, 2020 [54]       | Patients receive treatment planning from a ML-based prostate implant planning system<br>Length: 7 months | Conventional, manual technique        | Day 30 dosimetry: ns                                                                                                                                   | Planning time: I (2.38 min) vs. C (43.13 min), $p < 0.05$                                                                                                                                                            | N/A                                                                                             | N/A |
| Park et al, 2019 [55]          | Clinicians augmented with HeadXNet Model to predict intracranial aneurysms<br>Tasks: 115 examinations    | Clinicians without model augmentation | N/A                                                                                                                                                    | Sensitivity: increased by 0.059 ( $p = .01$ )<br>Specificity: ns<br>Accuracy: increased by 0.038 ( $p = .02$ )<br>Interrater agreement (Fleiss $\kappa$ ) increased by 0.060 ( $p = .05$ ).<br>Time to diagnosis: ns | N/A                                                                                             | N/A |
| Romero-Brufau et al, 2020 [56] | Implement an AI tool to improve glycemic control in patients with diabetes                               | N/A                                   | N/A                                                                                                                                                    | Attitudes: clinical staff felt that care was better coordinated after the AI implementation ( $p < 0.01$ ).                                                                                                          | N/A                                                                                             | N/A |

|                          |                                                                                                                 |                                 |                                      |                                                                                                                                                                                                                                                                   |                                                                                                                                                           |     |
|--------------------------|-----------------------------------------------------------------------------------------------------------------|---------------------------------|--------------------------------------|-------------------------------------------------------------------------------------------------------------------------------------------------------------------------------------------------------------------------------------------------------------------|-----------------------------------------------------------------------------------------------------------------------------------------------------------|-----|
|                          |                                                                                                                 |                                 |                                      | However, only 14% users would recommend it. The most useful aspect is team dialog prompts, and the least useful aspect was inadequate recommended interventions.                                                                                                  |                                                                                                                                                           |     |
| Rostill et al, 2018 [57] | Implement Technology integrated health management (TIHM) system for dementia care<br>Length: 9 months           | N/A                             | N/A                                  | System evaluation: carers are willing to recommend TIHM.                                                                                                                                                                                                          | Care interventions: the paper presents 3 cases in which the system led to interventions.<br>Patient evaluations: patients were willing to recommend TIHM. | N/A |
| Segal et al, 2014 [58]   | Neurologists with assistance from SimulConsult diagnostic decision support system<br>Task: 40 patient vignettes | Neurologists without assistance | N/A                                  | Diagnostic errors fell from 36% to 15%, and the drop was more evident among novices. Diagnosis relevance increased ( $p < 0.0001$ ), but there were no significant changes in comprehensiveness. Number of workup items decreased from 5.4 to 5.1 ( $p = .065$ ). | N/A                                                                                                                                                       | N/A |
| Segal et al, 2016 [59]   | Neurologists with assistance from SimulConsult diagnostic decision support system<br>Task: 8 patient vignettes  | Neurologists without assistance | N/A                                  | Diagnostic errors fell from 28% to 15% ( $p < 0.0001$ ) and the improvement was more evident among emergency medicine physicians ( $p = 0.013$ ) and novice physicians ( $p = 0.012$ ).                                                                           | N/A                                                                                                                                                       | N/A |
| Segal et al, 2017 [60]   | Implementation of SimulConsult diagnostic decision support system in clinical use                               | N/A                             | N/A                                  | Perceptions: medical specialists agreed that the tool was useful and could improve workflow. However, they expressed concerns over possible legal risks.                                                                                                          | N/A                                                                                                                                                       | N/A |
| Segal et al, 2019 [61]   | Integration of MedAware (prescription error                                                                     | N/A                             | 89% alerts were accurate, 85% alerts | N/A                                                                                                                                                                                                                                                               | 43% alerts changed later medical orders.                                                                                                                  | N/A |

|                              |                                                                                                                                                   |                                                                        |                                                                         |                                                                                                                                                                                                                                 |                                                                                                                                                              |     |
|------------------------------|---------------------------------------------------------------------------------------------------------------------------------------------------|------------------------------------------------------------------------|-------------------------------------------------------------------------|---------------------------------------------------------------------------------------------------------------------------------------------------------------------------------------------------------------------------------|--------------------------------------------------------------------------------------------------------------------------------------------------------------|-----|
|                              | identification and prevention system) into clinical practice<br>Length: 1 year and 11 months                                                      |                                                                        | were confirmed clinically valid, 80% were considered clinically useful. |                                                                                                                                                                                                                                 |                                                                                                                                                              |     |
| Shimabukuro et al, 2017 [62] | Patients receive AI-generated sepsis prediction<br>Length: 3 months                                                                               | Normal standard care                                                   | N/A                                                                     | N/A                                                                                                                                                                                                                             | LOS: I (10.3 days) vs. C (13.0 days), p=0.042<br>ICU LOS: I (6.31 days) vs. C (8.4 days), p=0.03<br>In-hospital mortality: I (8.96%) vs. C (21.3%) (p=0.018) | N/A |
| Sim et al, 2020 [63]         | Radiologists assisted by ALAND to detect malignant lung nodules on chest radiographs<br>Task: 800 radiographs                                     | Radiologists without assistance                                        | Sensitivity: 67.3%<br>FPPI <sup>d</sup> : 0.2                           | Sensitivity: I (70.3%) vs. C (65.1%), p<0.001<br>FPPI: I (0.18) vs. C (0.2), p<0.001<br>Decision change: 104 of 2400 radiographs were positively changed, 56 of 2400 radiographs were changed negatively.                       | N/A                                                                                                                                                          | N/A |
| Steiner et al, 2018 [64]     | Pathologists assisted by a DL model when reviewing lymph nodes for metastatic breast cancer<br>Task: 70 digitized slides from lymph node sections | Pathologists without assistance                                        | N/A                                                                     | Sensitivity: I (91%) vs. C (83%), p=0.02<br>Average review per image: I (61s) vs. C (116s), p=0.002<br>Interpretation difficulty: pathologists perceived the image review to be easier when assistance is available (p=0.0005). | N/A                                                                                                                                                          | N/A |
| Su et al, 2020 [65]          | Patients undergo colonoscopy with the assistance from an AI system<br>Length: 8 months                                                            | Patients undergo colonoscopy without the assistance from the AI system | N/A                                                                     | ADR: I (0.289) vs. C (0.165), p<0.001<br>Number of adenomas per procedure: I (0.367) vs. C (0.1178), p<0.001<br>PDR: I (0.383) vs. C (0.254), p<0.001                                                                           | N/A                                                                                                                                                          | N/A |



|                               |                                                                                                                                                                                   |                                                    |     |                                                                                                                                                                                                                                    |                                                                                                                                                       |                                                                                                                              |
|-------------------------------|-----------------------------------------------------------------------------------------------------------------------------------------------------------------------------------|----------------------------------------------------|-----|------------------------------------------------------------------------------------------------------------------------------------------------------------------------------------------------------------------------------------|-------------------------------------------------------------------------------------------------------------------------------------------------------|------------------------------------------------------------------------------------------------------------------------------|
|                               |                                                                                                                                                                                   |                                                    |     | Number of polyps per procedure: I (0.575) vs. C (0.305), $p < 0.001$<br>Withdrawal time: I (7.03 min) vs. C (5.68 min), $p < 0.001$<br>Adequate bowel preparation rate: I (87.34%) vs C (80.63%), $p = 0.023$                      |                                                                                                                                                       |                                                                                                                              |
| Titano et al, 2018 [66]       | Implement an AI system to triage cranial images<br>Task: 180 images                                                                                                               | Standard triage workflow (human only)              | N/A | Time to diagnosis: I (1.2s) vs. C (177s), $p < 0.0001$<br>More urgent cases appeared earlier in the queue ( $p = 0.01$ )                                                                                                           | N/A                                                                                                                                                   | N/A                                                                                                                          |
| Vandenberghe et al, 2017 [67] | Use the DL-based algorithm to recognize cancer cell types and diagnose breast cancer<br>Task: 71 breast tumor resection samples                                                   | N/A                                                | N/A | Decision concordance: 12 discordance cases were found (83% concordance rate).<br>Diagnosis modification: 8 cases were modified.                                                                                                    | N/A                                                                                                                                                   | N/A                                                                                                                          |
| Voerman et al, 2019 [68]      | Implement an antibiotic stewardship algorithm for hospitalized sepsis and lower respiratory tract infections (LRTI) patients<br>Length: two 4-year periods (2006-2009, 2010-2014) | N/A                                                | N/A | N/A                                                                                                                                                                                                                                | Numbers of patients with Clostridium difficile and antibiotic resistance infections, LOS, and antibiotic use decreased (statistical significance NR). | Average total costs per patient: decreased \$25,611 (49%) for sepsis and \$3630 (23%) for LRTI (statistical significance NR) |
| Wang et al, 2019 [69]         | Patients undergo colonoscopy with assistance from a polyp and adenoma detection system<br>Length: 6 months                                                                        | Patients undergo colonoscopy without AI assistance | N/A | ADR: I (29.1%) vs. C (20.3%), $p < 0.001$<br>Number of adenomas: I (0.53) vs. C (0.31), $p < 0.001$<br>Number of diminutive adenomas: I (185) vs. C (102), $p < 0.001$<br>Number of large adenomas: I (77) vs. C (58), $p < 0.001$ | N/A                                                                                                                                                   | N/A                                                                                                                          |

|                            |                                                                                                                                       |                                                   |     |                                                                                                                                                                                                                                                                                                                                                            |                                                                                                                                                                                                                                                                                                                                         |     |
|----------------------------|---------------------------------------------------------------------------------------------------------------------------------------|---------------------------------------------------|-----|------------------------------------------------------------------------------------------------------------------------------------------------------------------------------------------------------------------------------------------------------------------------------------------------------------------------------------------------------------|-----------------------------------------------------------------------------------------------------------------------------------------------------------------------------------------------------------------------------------------------------------------------------------------------------------------------------------------|-----|
|                            |                                                                                                                                       |                                                   |     | Number of hyperplastic polyps: I (114) vs. C (52), p<0.001                                                                                                                                                                                                                                                                                                 |                                                                                                                                                                                                                                                                                                                                         |     |
| Wang et al, 2019 [70]      | Implement a system that identifies under-use of anticoagulation in 14 clinics (one clinic entered every 28 days)<br>Length: 14 months | Usual care                                        | N/A | New anticoagulant prescriptions: I (4.1%), C (4.0%), p=0.86<br>Out of 1727 high-risk patients, 432 lacked evidence of anticoagulant prescriptions in the prior year. Pharmacists found that 17% patients (75 of 432) were potentially undertreated. The rest were excluded due to prior AF episode, documented anticoagulation refusal, and other reasons. | N/A                                                                                                                                                                                                                                                                                                                                     | N/A |
| Wang et al, 2020 [71]      | Patients undergo colonoscopy with assistance from EndoScreener<br>Length: 5 months                                                    | Patients undergo colonoscopy without EndoScreener | N/A | ADR: I (34%) vs. C (28%), p=0.030<br>PDR: I (52%) vs. C (37%), p<0.0001<br>Number of adenomas: I (1.04) vs. C (0.64), p<0.0001<br>Number of polyps: I (0.58) vs. C (0.38), p<0.0001                                                                                                                                                                        | N/A                                                                                                                                                                                                                                                                                                                                     | N/A |
| Wijnberge et al, 2020 [72] | Patients receive the early warning system for atrial fibrillation<br>Length: 11 months                                                | Standard care                                     | N/A | N/A                                                                                                                                                                                                                                                                                                                                                        | Median time-weighted average of hypotension: I (0.10 mm Hg) vs. C (0.44 mm Hg), p=0.001<br>Median time of hypotension per patient: I (8.0 min) vs. C (32.7 min), p<0.001<br>Treatment: ephedrine (I: 6%, C: 14%, p<0.001); vasopressors or fluids: ns<br>Time to intervention: I (53s) vs C (87s), p<0.001<br>Adverse events (I:0, C:2) | N/A |

|                      |                                                                                                              |                                                           |                                                                                                                               |                                                                                                                                                                                                                                                                                                                                                                         |                                               |     |
|----------------------|--------------------------------------------------------------------------------------------------------------|-----------------------------------------------------------|-------------------------------------------------------------------------------------------------------------------------------|-------------------------------------------------------------------------------------------------------------------------------------------------------------------------------------------------------------------------------------------------------------------------------------------------------------------------------------------------------------------------|-----------------------------------------------|-----|
| Wu et al, 2019 [73]  | Implement the cataract AI referral platform for collaborative management of cataracts<br>Length: 6 months    | N/A                                                       | AUC: >99%                                                                                                                     | Ophthalmologist-to-population service ratio increased by 10.2 fold compared with traditional healthcare system.                                                                                                                                                                                                                                                         | N/A                                           | N/A |
| Wu et al, 2019 [74]  | Patients undergo EGD with assistance of WISENSE system<br>Length: 3 months                                   | Patients undergo EGD without assistance of WISENSE system | Accuracy: 90.40%<br>Completeness of photo-documentation: ns                                                                   | Blind spot rate: I (22.46%), C (5.86%), p<0.001<br>EGD inspection time: I (5.03 min), C (4.24 min), p<0.001<br>Decreased number of ignored patients in gastric sites and in the lesser curvature of middle-upper body in forward view (p<0.001).                                                                                                                        | Adverse event: no significant adverse events. | N/A |
| Yoo et al, 2018 [75] | A radiologist assisted by a system for thyroid nodule diagnosis<br>Task: 50 patients undergo ultrasonography | The radiologist without system assistance                 | Sensitivity: 80.0%<br>Specificity: 88.1%<br>PPV: 83.3%<br>NPV: 85.5%<br>Accuracy: 84.6% (compared with radiologist alone: ns) | Compared with unassisted radiologist,<br>Sensitivity: I (92.0%), C (84.0%), p=0.037<br>Specificity: I (85.1%), C (95.5%), p=0.005<br>PPV: I (82.1%), C (93.3%), p=0.008<br>NPV: ns<br>Accuracy: ns<br>Compared with system,<br>Sensitivity: I (92.0%) vs. C (80.0%), p = 0.009<br>Specificity: ns<br>NPV: I (93.4%) vs. C (88.9%), p = 0.013<br>PPV: ns<br>Accuracy: ns | N/A                                           | N/A |

<sup>a</sup>N/A: not applicable

<sup>b</sup>I: interventional group; C: control group

<sup>c</sup>ns: not significant

<sup>d</sup>ADR: adenoma detection rate; FPPI: false-positive per image; ICU: intensive care unit; LOS: length of stay; PPV: positive predictive value; NPV: negative predictive value; PDR: polyp detection rate
